## CORRECTION

# Correction: Honeybees in a virtual reality environment learn unique combinations of colour and shape

**Claire Rusch, Eatai Roth, Clément Vinauger and Jeffrey A. Riffell**

There was an error published in *J. Exp. Biol.* **220**, 3478-3487.

The author contributions section was incorrect. The corrected section is below.

Conceptualization: C.R., E.R., C.V., J.A.R.; Methodology: C.R., E.R., C.V.; Software: E.R.; Investigation: C.R., E.R., C.V.; Writing - original draft: C.R., E.R., C.V., J.A.R.; Writing - review & editing: C.V., J.A.R.; Visualization: C.R., E.R., J.A.R.; Supervision: C.V., J.A.R.; Project administration: J.A.R.; Funding acquisition: J.A.R.

The authors apologise for any inconvenience this may have caused.
